# Supplementary material for: Toward understanding the structural heterogeneity and ion pair stability in dicationic ionic liquids
Source: Royal Society of Chemistry journal article supplement (doi:10.1039/c4sm01742k), 2014-01-01
Supplement: c4sm01742k1.pdf [file c4sm01742k1.pdf]

## Supplementary Information

# Toward Understanding the Structural Heterogeneity and Ion Pair Stability in Dicationic Ionic Liquids

Song Li,<sup>a</sup> José Leobardo Bañuelos,<sup>\*b,c</sup> Pengfei Zhang,<sup>c</sup> Guang Feng,<sup>\*d</sup> Sheng Dai,<sup>c,e</sup> Gernot Rother<sup>c</sup> and Peter T. Cummings<sup>a</sup>

<sup>a</sup> Department of Chemical and Biomolecular Engineering, Vanderbilt University, Nashville, TN 37235, USA.

<sup>b</sup> ISIS Facility, STFC Rutherford Appleton Laboratory, Harwell Oxford, Didcot, OX11 0QX.  
Email: jose.banuelos@stfc.ac.uk

<sup>c</sup> Chemical Sciences Division, Oak Ridge National Laboratory, Oak Ridge, TN 37831, USA.

<sup>d</sup> State Key Laboratory of Coal Combustion, School of Energy and Power Engineering, Huazhong University of Science and Technology, Wuhan 430074, China. Email: gfeng@hust.edu.cn

<sup>e</sup> Department of Chemistry, University of Tennessee, Knoxville, TN 37996, USA

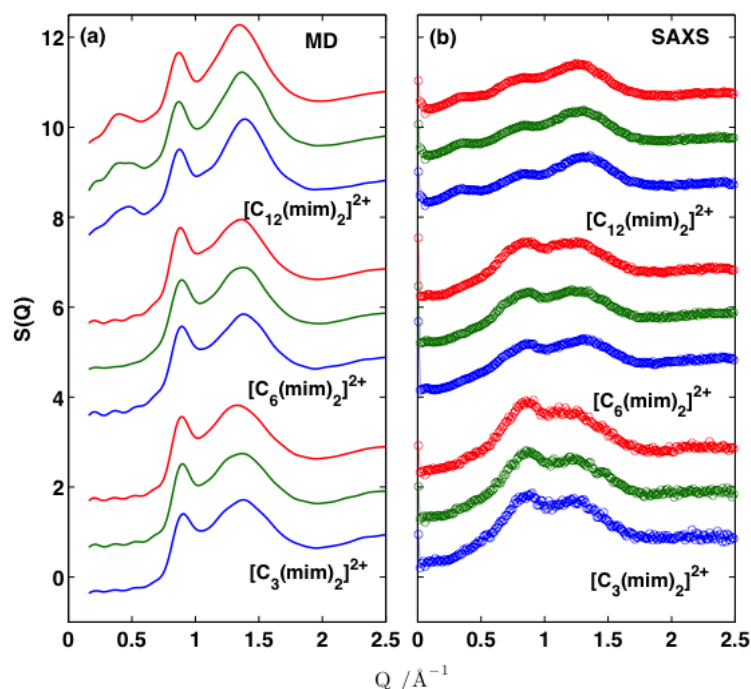

**Figure S1.** Total static structure function of  $[C_n(\text{mim})_2](\text{Tf}_2\text{N})_2$  from MD simulation (a) and SAXS (b). The blue, green and red lines denote the data obtained at 280, 320 and 360 K, respectively.

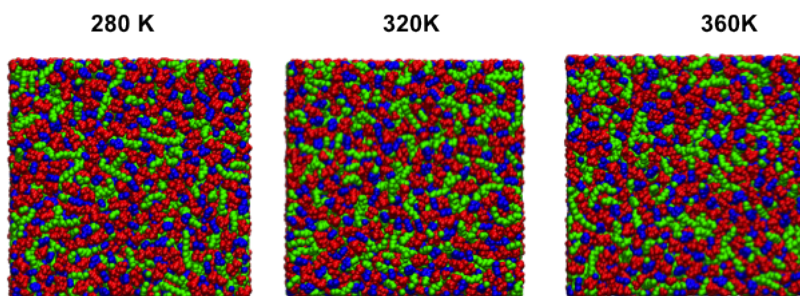

**Figure S2.** Snapshots of  $[\text{C}_{12}(\text{mim})_2](\text{Tf}_2\text{N})_2$  from MD simulation at 280, 320 and 360 K: red, anion; blue, cation head; green, alkyl chain.

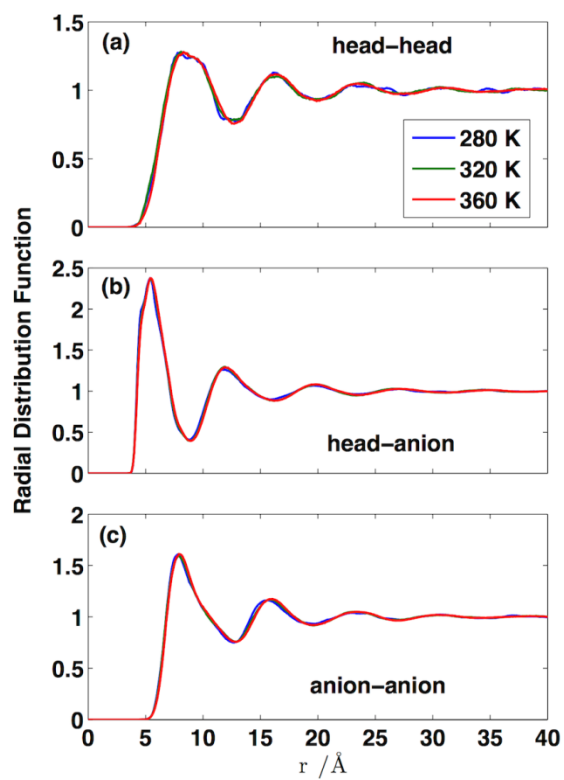

**Figure S3.** Radial distribution functions of cation head-head (a), head-anion (b) and anion-anion (c) of  $[\text{C}_{12}(\text{mim})_2](\text{Tf}_2\text{N})_2$  calculated from MD simulation at 280, 320 and 360 K.

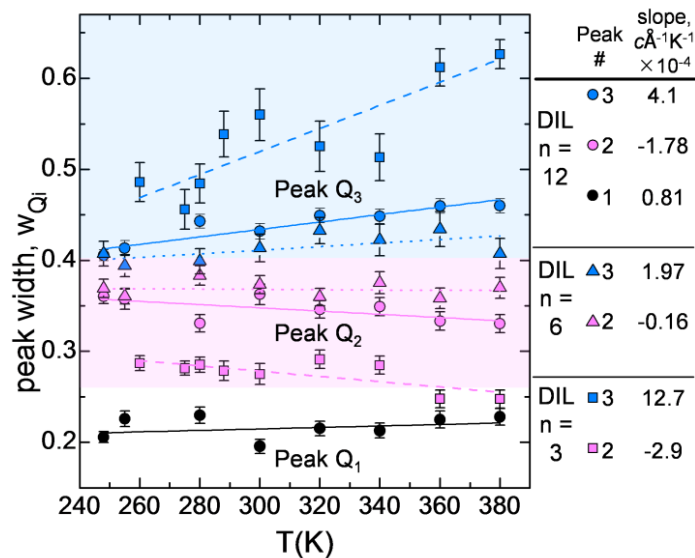

**Figure S4.** Peak width parameter for peaks  $Q_1$ ,  $Q_2$ , and  $Q_3$  plotted as a function of temperature. The slopes of each linear fit to the temperature-dependent data are shown to the right.

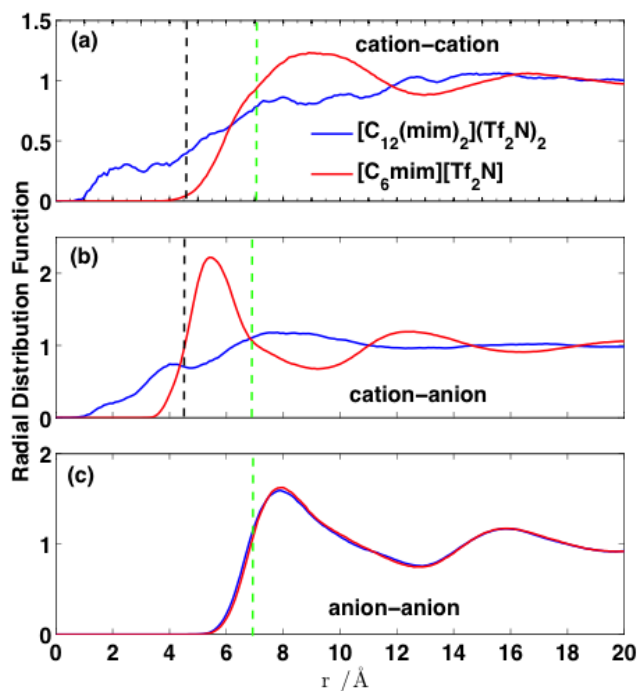

**Figure S5.** Radial distribution functions of cation-cation (a), cation-anion (b) and anion-anion (c) of  $[\text{C}_{12}(\text{mim})_2](\text{Tf}_2\text{N})_2$  and  $[\text{C}_6\text{mim}][\text{Tf}_2\text{N}]$  calculated from MD simulation at 320 K. The black and green dashed lines denote the positions at 4.5 Å and 7 Å, respectively.

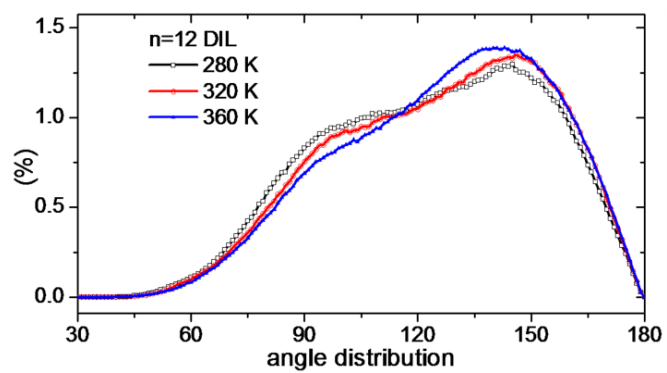

**Figure S6.** Dication linking chain angle distribution at 280K, 320K, and 360K for  $n = 12$  DIL from MD simulation.
